# Supplementary material for: The soil fertility and leaf nutrient status in enset gardens in different altitude zones of the Gamo highlands, Ethiopia and inferences for Xanthomonas wilt prevalence
Source: Copernicus journal article supplement (doi:10.5194/soil-2019-78), 2019-12-19
Supplement: Supplementary file [file soil-2019-78-AC2-supplement.pdf]

Supplementary table: Details on soil and plant sampling techniques

| # Gardens       | # Garden zones | # soil samples | # plant samples                     |                                                           |                                            | # house holds   |
|-----------------|----------------|----------------|-------------------------------------|-----------------------------------------------------------|--------------------------------------------|-----------------|
|                 |                |                | for intra-garden nutrient variation | for comparison of symptomatic and asymptomatic plants     | For assessing general leaf nutrient status |                 |
| 40              | Inner (40)     | 40             | 19 from 19 gardens                  | 20 symptomatic and 20 asymptomatic plants from 12 gardens |                                            | 40              |
|                 | Outer (40)     | 40             | 19 from 19 gardens                  |                                                           |                                            |                 |
|                 | Outfield (28)  | 28             |                                     |                                                           |                                            | 28 <sup>©</sup> |
| 58 <sup>s</sup> |                |                |                                     |                                                           | 218                                        | 58              |

NB: <sup>s</sup>=19+12+ 27 gardens; <sup>©</sup>= belonged within 40 gardens (12 out of 40 gardens had no outfields). Number of samples for intra-garden nutrient variation depends on whether the specified variety (i.e. Maze) is available in each garden zone at similar age.
