# Supplementary material for: The soil fertility and leaf nutrient status in enset gardens in different altitude zones of the Gamo highlands, Ethiopia and inferences for Xanthomonas wilt prevalence
Source: Copernicus journal article supplement (doi:10.5194/soil-2019-78), 2019-12-19
Supplement: Supplementary file [file soil-2019-78-RC1-supplement.pdf]

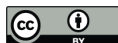

## The soil fertility and leaf nutrient status in enset gardens in different altitude zones of the Gamo highlands, Ethiopia and inferences for *Xanthomonas* wilt prevalence

Sabura Shara<sup>1</sup>, Rony Swennen<sup>2, 8, 9</sup>, Jozef Deckers<sup>3</sup>, Fantahun Weldesenbet<sup>4</sup>, Laura, Vercammen<sup>3</sup>, Fassil Eshetu<sup>5</sup>, Feleke Woldeyes<sup>6</sup>, Guy Blomme<sup>7</sup>, Roeland Merckx<sup>3</sup> and Karen Vancampenhout<sup>3</sup>

5 <sup>1</sup>KU Leuven, Cluster Bioengineering Technology, Dept. of Microbial and Molecular Systems, Geel, Belgium.

<sup>2</sup>KU Leuven, Division of Crop Biotechnics, Dept. of Biosystems, Belgium

<sup>3</sup>KU Leuven, Dept. of Earth and Environmental Sciences, Belgium

<sup>4</sup>Ethiopian Biotechnology Institute, Addis Ababa, Ethiopia

<sup>5</sup>Arba Minch University, College of Natural Sciences, Dept. of Biology, Arba Minch, Ethiopia

10 <sup>6</sup>Ethiopian Biodiversity Institute, Addis Ababa, Ethiopia

<sup>7</sup>Bioversity International, c/o ILRI, Addis Ababa, Ethiopia

<sup>8</sup>International Institute of Tropical Agriculture, Arusha, Tanzania

<sup>9</sup>Bioversity International, Leuven, Belgium

**Correspondence to:** Karen Vancampenhout (karenvancampenhout@kuleuven.be)

15

### Abstract

*Enset* (*Ensete ventricosum*) is a productive, drought-tolerant and multipurpose food security crop grown in the densely populated Ethiopian highlands. Its production suffers from poor soil fertility management and a bacterial wilt disease caused by the pathogen *Xanthomonas campestris* pv. *musacearum*. The aim of this study was to assess soil-plant-nutrient variation within enset home gardens over three different altitudes (ranging from 2000-3000 masl) in the Chencha catchment of the Gamo highlands and investigate whether this variation affects disease prevalence. Plant available P, Ca and Mg significantly increase with decreasing elevation but significantly decline with distance from the house. In addition, soil pH, conductivity, total organic carbon (TOC), total N, available K, Mn and Fe levels significantly decline with distance from the house. This indicates that soil fertility factors are influenced by both agro-ecology and farmers' management practices. Moreover, most nutrients reach very high levels in the garden whereas the more distant outfields are severely nutrient deprived. Plant nutrient levels are not correlated to soil nutrient levels except for N. Twenty two percent of the studied farms are symptomatic for bacterial wilt and its prevalence increases with decreasing elevation. Symptomatic gardens have a higher soil pH and available P, K and Ca levels. We conclude that soil fertility management in enset gardens should be optimized in relation to agro-ecological conditions and that both elevation and soil nutrient status need to be considered when developing strategies to curb the current *Xanthomonas* wilt epidemic.

**Keywords:** *Ensete ventricosum*, fertility gradient, inner, outer and outfield zone, optimum nutrient levels, soil properties, symptomatic and non-symptomatic.



35

## 1. Introduction

Food security is a main target for the global sustainable development goals (Mariño and Banga, 2016). Moreover, new challenges to food security arise because of climate change (Rosegrant et al., 2003). Hence, crops with tolerance to marginal conditions and resilience to climatic stress such as cassava, cocoyams, yams, sweet potato, and perennials will play an increasingly important role in food security, but they are underrepresented in international literature (Allemann et al., 2004; Nayar, 2014). One of these so-called ‘orphan crops’ is enset or ‘false banana’ (*Ensete ventricosum* (Welw.) Cheesman). It is one of the oldest cultivated plants in Ethiopia (Brandt et al., 1997) feeding about 20 million people (Merga et al., 2019; Yemataw et al., 2014). Nicknamed the ‘tree against hunger’, enset can withstand prolonged periods of moisture stress (Brandt et al., 1997; Quimio and Tezera, 1996), and is an important resource for the farming systems of the densely populated highlands of south, southwestern and central parts of Ethiopia (Brandt et al., 1997; Merga et al., 2019; Yemataw et al., 2014). Early reports mention that enset is generally grown between 1,100 to above 3,000 masl but thrives best from 2,000 and 2,750 masl (Brandt et al., 1997).

Enset is a multipurpose crop used as food and animal forage, and for fiber and medicinal purposes (Bezuneh et al., 1967; Brandt et al., 1997; Nurfeta et al., 2008; Tesfaye and Lüdders, 2003). The major food products are ‘kocho’ and ‘bulla’ (both processed products from pseudostem and corm), and ‘amicho’ (boiled corm; Andeta et al., 2018; Brand et al., 1997; Tsegaye and Struik, 2002). Its yield per ha is higher than of any other crop cultivated in Ethiopia, with the fresh weight of fermented kocho ranging from 19-33 t/ha/year (Tsegaye and Struik, 2001). Moreover, the dense leaf canopy is an asset in reducing land degradation and sequestering carbon (Brandt et al., 1997; Tamire and Argaw, 2015). Despite its high economic and socio-environmental importance, enset farming systems remain under-researched compared to common arable crops (Borrel et al., 2019). ~~Due to limited genetic research~~, there is also no widely adopted nomenclature for enset varieties. Local names exist based on agro-morphological traits and uses, and varieties are also commonly intercropped in complex patterns and associations (Cartledge, 1995, Tesfaye and Lüdders, 2003; Yemataw et al., 2014).

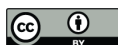

Two particular problems reduce yields and hamper the economic competitiveness of the enset systems. The first one is poor soil fertility management. Enset typically grows on weathered tropical soils, which require organic inputs as part of the soil fertility management strategy (e.g. application of animal manure and household refuse; Elias et al., 1998; Tamire and Argaw, 2015; Tsgaye and Struik, 2002). However, supply of organic inputs is limited and mainly acquired from free-ranging cattle, which puts an additional strain of overgrazing on the already degraded grazing lands and fields (Amede and Taboge, 2007; Assefa and Hans-Rudolf, 2017; Garedew and Ayiza, 2018). Hence, the optimal use of scarce nutrient resources is vital, yet there are no recommendations on optimal nutrient management for enset gardens available to farmers (Amede and Taboge, 2007; Elias et al., 1998; Uloro and Mengel, 1994).

Secondly, the enset *Xanthomonas* or bacterial wilt (EXW) caused by *Xanthomonas campestris* pv. *musacearum* (Xcm) is ~~wreaking havoc~~ in enset dependent farming communities since its first outbreak in Ethiopia (Garedew and Ayiza, 2018; Yemataw et al., 2017; Yirgou and Bradbury, 1968). It can cause yield losses of up to 100% (Yemataw et al., 2016) and all cultivated varieties are susceptible (Merga et al., 2019), although some variation in level of susceptibility/tolerance has been reported (Welde-Michael et al., 2008a; Wolde et al., 2016). Control methods available to farmers are limited to basic phytosanitary practices involving the removal of the diseased plants, disinfection of farm tools, and use of clean planting materials (Tadesse et al., 2003; Welde-Michael et al., 2008b). So far they have had little effect in curbing the disease. Disease-free plantlets are to date not available to farmers (Negash et al., 2000; Welde-Michael et al., 2008a; Wolde et al., 2016). Hence, alternative disease control strategies need to be explored, based on a better understanding of the relation between disease prevalence, soil fertility management and environmental factors (Francl, 2001; Keane and Kerr, 1997). ~~In general, environmental and edaphic conditions and play an important role in disease control in various crops (Agrios, 2005; Huber and Graham, 1999; Huber and Haneklaus, 2007; Huber et al., 2012; Mwebaze et al., 2006; Welde Michael et al., 2008b).~~ Also, recent studies on banana have indicated an effect of certain nutrients (N, P, K, Ca, and Si) in reducing bacterial wilt incidence (Atim et al., 2013; Mburu et al., 2016; Ochola et al., 2014). We therefore hypothesize that an insight into these interactions might yield a complementing path for disease control in enset systems as well.



Using an on-farm observation approach, the aim of this study was therefore to contribute to food security  
90 and livelihood improvement of enset dependent farm households by assessing (i) soil properties of enset  
gardens in various agro-ecological zones and variations within the garden and (ii) soil-plant-pathogen  
interactions by comparing nutrient levels in symptomatic and non-symptomatic gardens and plants. The  
Gamo highlands are particularly relevant as they have a long history of enset cultivation (Cartledge, 1999;  
Olmstead, 1975) and EXW is common in the area. Moreover, local elevation gradients reflect much of  
95 the Ethiopian agro-ecological diversity. In total, 276 smallholder enset gardens were selected between  
2,000-3,000 masl, which corresponds to the main altitudinal enset belt in the Ethiopian highlands. In each  
farm, soil properties were assessed nearer and further away from the house and soil and leaf nutrients  
were compared. Additionally, the prevalence of EXW disease was assessed, and the relationship between  
soil properties and affected farms was investigated. Moreover, the leaf nutrient contents of symptomatic  
100 and non-symptomatic plants were compared.

## 2. Materials and methods

### 2.1 Study area

The study was carried out in the Chencha catchment of the Gamo Highlands in Southern Nations,  
105 Nationalities and People's regional state of Ethiopia. It was located between 6°05' N-6°35' N and 37°30'  
E-37°45' E. The area rises up from the base of Lake Abaya at 1,100-3,250 masl over a distance of 20 km  
(Assefa and Hans-Rudolf, 2017; Coltorti et al., 2019). Located in the western part of the southern  
Ethiopian rift valley escarpment, the landscape of the Chencha highlands is characterized by flat plateaus  
bordered by steep slopes and dissected by concave valleys and gullies due to erosion of the volcanic  
110 sequence (Coltorti et al., 2019). ~~The bedrock of the area is mainly made up of continental flood basalts,  
buried under thick ignimbrites, rhyolites and trachytic flows comprising of lava flows, pyroclastic and  
lacustrine deposits (Ayalew et al., 2002; Tefera et al., 1990).~~ Predominant soil types in the enset growing  
highlands are reddish, deeply weathered Nitisols and Luvisols (Coltorti et al., 2019).

In the Gamo Highlands, the local climate is strongly influenced by the complex terrain (Jury, 2014) and  
115 mainly associated with altitudinal gradients (Assefa and Hans-Rudolf, 2017; Berhanu et al., 2013). The  
mean annual temperature ranges between 23 °C and 14 °C and the mean annual rainfall between 750 mm



and 1,700 mm, in the lowlands and highlands, respectively. On the basis of local agro-ecological zonation, four climate zones were defined in the Gamo highlands. These were ‘kolla’ (semi-arid), below 1,500 masl; ‘woyna dega’ (sub-humid), between 1,500-2,300 masl; ‘dega’ (humid), between 2,300-3,000 masl, and ‘wurch (frost), a cold alpine zone above 3,000 masl (Cartledge, 1999).

## 2.2 Sampling and data collection

A reconnaissance field visit and discussion with farmers before the start of the actual study indicated that the disease seems more problematic with decreasing elevation. Hence, a stratified random sampling based on the elevation gradient was followed. The larger catchment was divided into three elevation zones: lower (2,000-2,300), middle (2,300-2,600) and higher (2,600-3,000 masl). In each zone 72, 83 and 121 households were randomly chosen, respectively. Inter-varietal differences were not maintained as a primary focus in this study. The data acquisition had to take the existing complexities in the enset management system into account. In affected gardens, symptomatic plants are commonly uprooted; the decision depending on severity stage, enset maturity stage, and variety, the household’s workload and awareness of sanitary measures. Hence it was difficult to exactly quantify disease incidence in a garden.

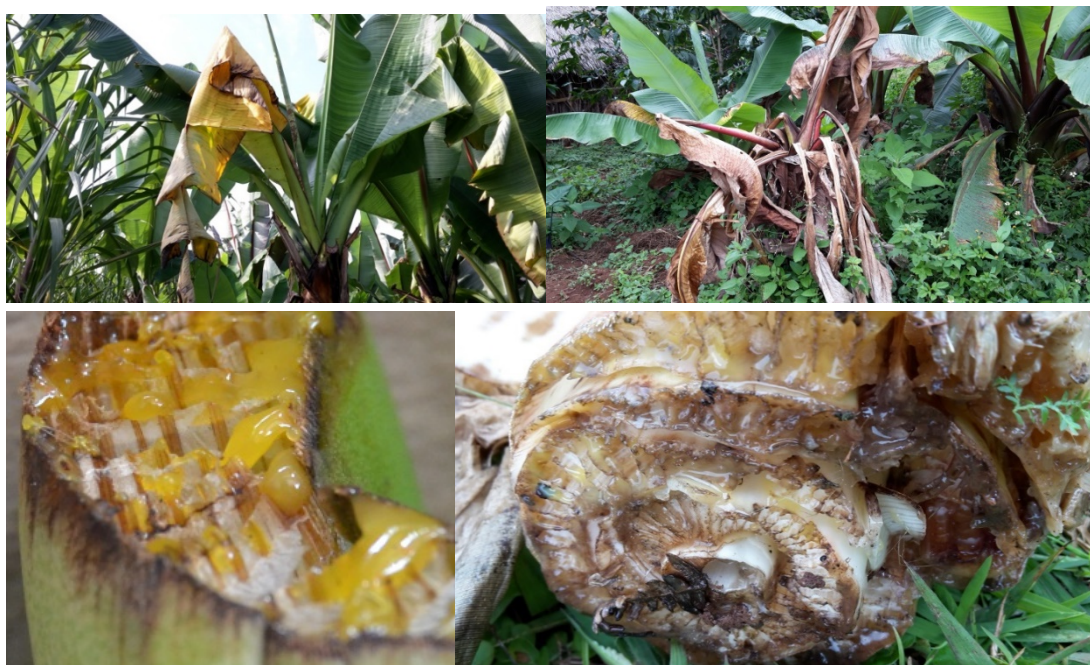





145 Fig. 1. Symptoms of leaf wilting, leaf yellowing and complete death of the aerial plant part (top row) and internal symptoms of yellow bacterial ooze in the cut leaf petiole and section of leaf sheath (bottom row) caused by *Xanthomonas campestris* pv. *musacearum*.

Therefore, disease presence/absence data were gathered at the household level to map disease distribution at the catchment scale. Furthermore, each household was asked about the history of disease presence in the past five years. Symptoms were readily recognized by farmers and the identification was aided by characteristic visual symptoms, i.e. leaf wilting, leaf yellowing, yellow slimy bacterial ooze inside the petiole and leaf sheath tissues (Fig. 1). Each home garden was recorded as “symptomatic” (symptoms present) or “non-symptomatic” (no disease symptoms observed). The study took place from June to November 2016 to March 2017.

155 Soil properties were compared between farms, but as onset is produced in highly diverse home gardens around traditional houses (Fig. 2), intra-farm variability may be important as well. Each onset home garden was therefore divided into two fertility zones (Fig. 2), i.e. inner (IR) and outer zone (OR), hereafter the infields. In addition, an outfield zone (OF) with annually cropped fields around the onset garden, was included in the study (Fig. 2). A mixed soil sample of four composites was taken per fertility zone and per garden from 40 onset gardens and 28 outfields. Sampling depth comprised the upper 25 cm of soil, where most of the onset cord roots are typically distributed (Blomme et al., 2008; Zewdie et al., 2008). The number of sampled outfields was lower compared to the IR and OR zones, as not all onset gardens had outfields. Also, 19 leaf samples were collected from the variety locally identified as *Maze*, a variety often reported as tolerant to EXW (Weldemichael et al., 2008a; Handoro and Michael, 2007), per fertility zone from 19 gardens to measure leaf nutrient levels in relation to soil fertility status. Moreover, leaf samples were taken from 20 non-symptomatic and 20 symptomatic plants (same pairs of 10 local varieties) in 12 gardens. Finally, as no literature exists on typical nutrient concentrations in onset leaves, leaf nutrient levels were assessed of non-symptomatic plants from an additional 27 gardens, making a total dataset of 58 onset gardens and 218 samples. Since no standard leaf sampling method is described for onset, the common method for banana was adopted (Martin-Prével analysis, 1977), taking the central

160  
165  
170



10 cm whole lamina on both sides of the midrib. The second fully open leaf was taken from mature plants of approximately 5-7 years old.

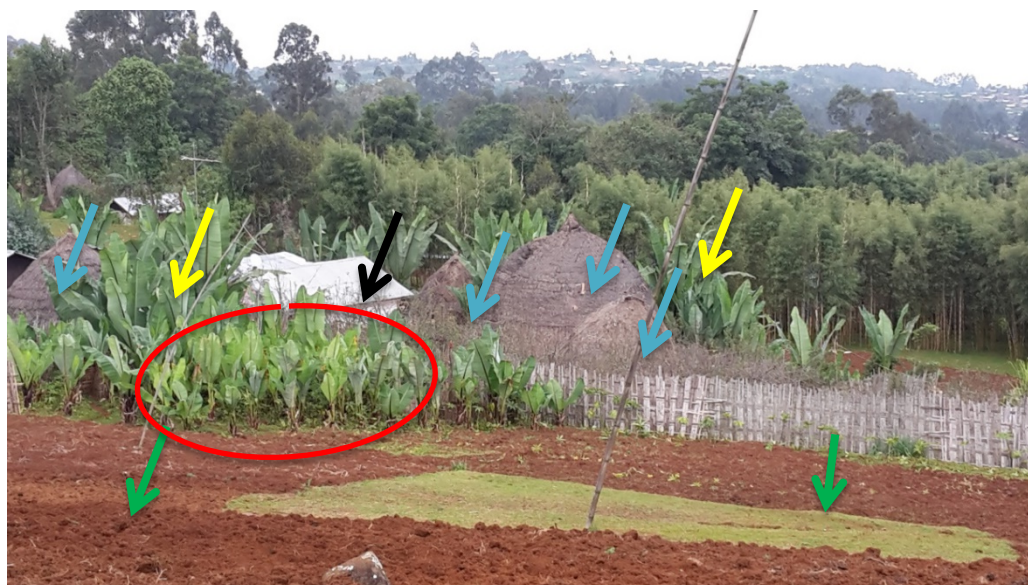

Fig. 2. Typical enset-based farm in the Gamo highlands, showing traditional huts (light blue arrows), and  
175 an iron-roofed house (black arrow) surrounded by an enset home garden (infields) and demonstrating  
different fertility zones: the area shown by the yellow arrows, with an about 4-6 m radius depending on  
the size of a garden, represents the area closest to the house and is called the inner zone (IR). The red  
ellipse, i.e. the remaining part of enset garden surrounding the IR, represents the outer zone (OR) and part  
of the farm devoted for cultivation of annual crops is the outfield (green arrows).

180

### 2.3 Laboratory analysis

Soil pH and electrical conductivity (EC) were measured by using 1:5 soil to water ratio. Plant-available  $K_{av}$ ,  $Mg_{av}$ ,  $Ca_{av}$ ,  $Fe_{av}$ ,  $Mn_{av}$  and  $P_{av}$  were extracted by ammonium lactate solution (Egner et al., 1960) and analyzed by inductively coupled plasma optical emission spectroscopy (Winge et al., 1979). Soil and leaf  
185 total organic carbon and total nitrogen were measured by elemental analysis (Carlo Erba EA1110; Kirsten and Hesselius, 1983). Leaf samples were oven-dried at 60-70°C and finely ground. Approximately 50 mg of each ground sample was extracted by 1 ml  $HNO_3$  in acid washed glass tube. Quantification of P, K, Ca, Mg, Zn, Cu, Fe, Mn, Al, Mo, Ni, and Co was made using inductively coupled plasma mass



190 spectroscopy (Date and Gray, 1983). Soil texture was determined by Laser diffraction particle size analyzer after pre-treatment with HCl and H<sub>2</sub>O<sub>2</sub> (LS 13320-Beckman Coulter; ISRIC, 2002).

## 2.4 Statistical analysis

Data analysis was executed using the JMP Pro 14 statistical software package (SAS Institute Inc., 2018). First, an explorative principal component analysis was computed on soil properties. Then, a one-way  
195 analysis of variance was used to determine variation in soil properties among elevations and between symptomatic and non-symptomatic gardens. General nutrient status in enset leaves was the mean value of all the samples for each nutrient. On-farm variability in soil properties among the fertility zones was determined by the linear mixed model. A paired sample t-test was employed to determine the variation in  
200 plant nutrient levels within enset garden and symptomatic and non-symptomatic plants. Multiple comparisons of significant means were determined using the Tukey-Kramer HSD post hoc test. When unequal variance was observed, Wilcoxon test was used with Steel-Dwass post hoc test. All means were separated at 5 % probability level. Disease prevalence (%) was compute as  
$$\frac{\text{Number of symptomatic gardens}}{\text{Total number of assessed gardens}} * 100.$$

## 205 3. Results

### 3.1 Gradients in soil properties between enset gardens: effect of soil texture and elevation

Factor loadings of the first two principal components explained 56.4 % of the variation of the data (Fig. 3). Component 1 (38.9 % of the variation) showed positive loadings for most soil nutrients, soil carbon, and pH, whereas Al has negative loadings on this component. Component 2 (17.5 % of the variation) has  
210 positive loadings for sand and silt while negative loadings for clay content. Hence, component 1 mainly reflects soil nutrient status and component 2 the soil texture. Eleven (64.71 %) of of the 17 gardens on the positive side of component 1 belonged to the middle and lower elevations. Of the 23 gardens on the negative side of the axis, 18 (78.26 %) belonged to middle and higher elevation; only five (21.74 %) to the lower elevation.



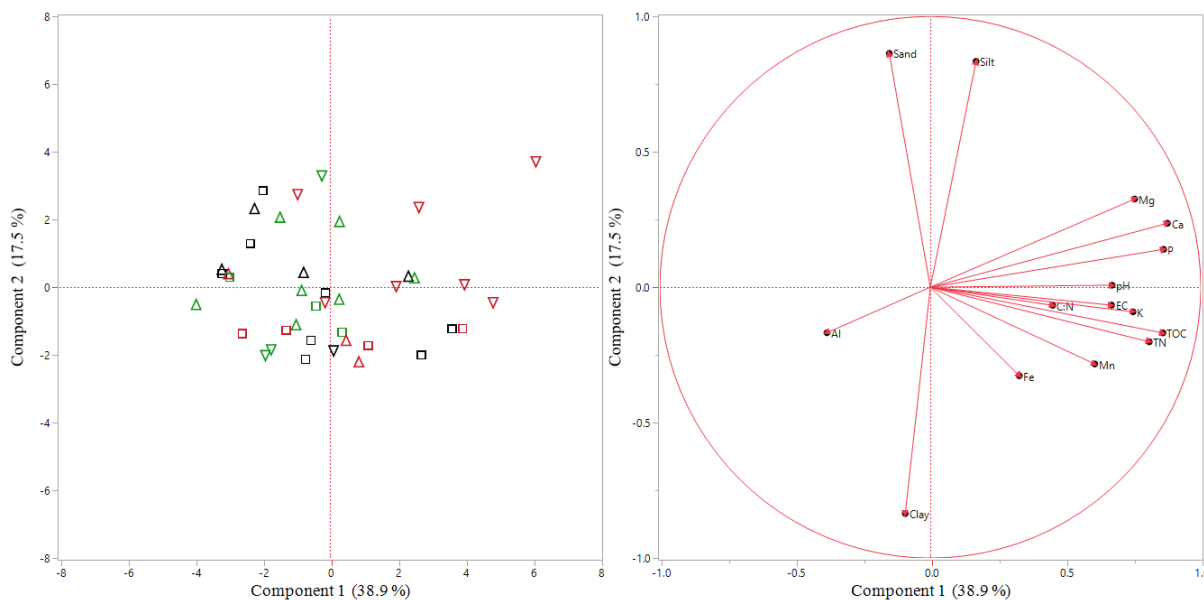

215

Fig. 3. A score plot (left) showing the distribution patterns of 40 enset gardens in relation to the loadings plot (right) of soil properties (pooled averages of inner and outer zones) over the two principal components. Symbols in the score plot denote enset gardens at higher ( $\Delta$ ), middle ( $\square$ ) and lower ( $\nabla$ ) elevations and colours represent currently symptomatic gardens (red), gardens symptomatic in the past 220 five years (black) and gardens with no symptoms (green).

The average and range of values of soil properties against elevation gradient are presented in Table 1. Soil texture in enset gardens did not differ with elevation and the dominant class of the soil texture was heavy clay. Most soil chemical properties showed an increasing trend with decreasing elevation, yet this trend was significant only for plant available  $P_{av}$  ( $p < 0.05$ ),  $Ca_{av}$  ( $p < 0.001$ ) and  $Mg_{av}$  ( $p < 0.01$ ). On the contrary, significantly ( $p < 0.001$ ) higher levels of  $Al_{av}$  were observed at a higher elevation compared to the middle and lower elevation. The difference was largest for  $P_{av}$  and  $Ca_{av}$ , with ranges from 31.8 to 1771.6 mg/kg and 1176.9 to 7865.3 mg/kg, respectively.

230



Table 1. Variation in soil factors between enset gardens (inner and outer zones pooled) with respect to elevation (H=Higher: 2600-3000 masl, N=14; M=Middle: 2300-2600 masl, N=15; L=Lower: 2000-2300 masl, N=11). Soil nutrients refer to the available forms (mg/kg).

| Elevation | Soil properties | Max  | Min  | Mean±SD                | Soil properties  | Max    | Min    | Mean±SD                    |
|-----------|-----------------|------|------|------------------------|------------------|--------|--------|----------------------------|
| H         |                 | 10.9 | 1.5  | 6.1±2.7 <sup>a</sup>   |                  | 354.7  | 31.8   | 151.1±105.0 <sup>b</sup>   |
| M         | Sand (%)        | 11.0 | 0.4  | 3.6±3.1 <sup>a</sup>   | P <sub>av</sub>  | 1072.5 | 34.8   | 390.4±316.9 <sup>ab</sup>  |
| L         |                 | 12.0 | 0.2  | 5.4±3.6 <sup>a</sup>   |                  | 1771.6 | 33.6   | 711.5±660.1 <sup>a</sup>   |
| H         | Silt (%)        | 37.5 | 27.3 | 32.6±3.2 <sup>a</sup>  |                  | 3609.6 | 401.6  | 1726.5±860.2 <sup>a</sup>  |
| M         |                 | 41.7 | 25.4 | 30.8±4.2 <sup>a</sup>  | K <sub>av</sub>  | 4012.4 | 686.0  | 1742.2±1078.6 <sup>a</sup> |
| L         |                 | 46.4 | 26.3 | 32.3±5.8 <sup>a</sup>  |                  | 4013.1 | 445.7  | 1625.8±1006.4 <sup>a</sup> |
| H         | Clay (%)        | 71.2 | 53.0 | 61.5±5.6 <sup>a</sup>  |                  | 5678.7 | 1762.8 | 3818.3±1902.5 <sup>b</sup> |
| M         |                 | 73.4 | 31.0 | 66.4±5.0 <sup>a</sup>  | Ca <sub>av</sub> | 6982.7 | 1176.9 | 3569.5±1455.3 <sup>b</sup> |
| L         |                 | 73.5 | 30.0 | 58.3±15.8 <sup>a</sup> |                  | 7865.3 | 2477.2 | 5889.5±1902.5 <sup>a</sup> |
| H         |                 | 7.6  | 5.1  | 6.3±0.8 <sup>a</sup>   |                  | 1127.0 | 529.8  | 819.2±194.7 <sup>ab</sup>  |
| M         | pH              | 7.1  | 5.1  | 6.4±0.6 <sup>a</sup>   | Mg <sub>av</sub> | 1154.3 | 320.2  | 701.4±222.3 <sup>b</sup>   |
| L         |                 | 7.7  | 6.0  | 6.7±0.4 <sup>a</sup>   |                  | 1368.6 | 614.5  | 969.2±202.3 <sup>a</sup>   |
| H         |                 | 0.4  | 0.1  | 0.2±0.1 <sup>a</sup>   |                  | 881.0  | 283.4  | 552.1±216.0 <sup>a</sup>   |
| M         | EC (ds/m)       | 0.5  | 0.1  | 0.3±0.1 <sup>a</sup>   | Mn <sub>av</sub> | 673.1  | 270.5  | 459.5±126.6 <sup>a</sup>   |
| L         |                 | 0.5  | 0.1  | 0.3±0.1 <sup>a</sup>   |                  | 778.7  | 377.2  | 571.5±116.9 <sup>a</sup>   |
| H         |                 | 4.4  | 1.9  | 3.3±0.7 <sup>a</sup>   |                  | 664.8  | 267.7  | 487.5±117.9 <sup>a</sup>   |
| M         | TOC (%)         | 5.6  | 2.2  | 3.7±0.9 <sup>a</sup>   | Fe <sub>av</sub> | 627.1  | 252.1  | 457.9±134.2 <sup>a</sup>   |
| L         |                 | 5.3  | 2.4  | 3.9±1.1 <sup>a</sup>   |                  | 573.8  | 194.6  | 404.9±96.3 <sup>a</sup>    |
| H         |                 | 0.4  | 0.2  | 0.3±0.1 <sup>a</sup>   |                  | 793.1  | 439.5  | 560.1±95.8 <sup>a</sup>    |
| M         | TN (%)          | 0.5  | 0.2  | 0.4±0.1 <sup>a</sup>   | Al <sub>av</sub> | 647.4  | 417.9  | 419.4±112.5 <sup>b</sup>   |
| L         |                 | 0.5  | 0.2  | 0.4±0.1 <sup>a</sup>   |                  | 572.4  | 228.5  | 396.1±104.4 <sup>b</sup>   |

Means followed by the same letter within a column and for the same property are not significantly different at

235 p<0.05

### 3.2 Gradients in soil properties between infields and outfields

Apart from soil texture, the measured soil properties changed significantly with distance from the house (Table 2). The differences in soil pH, conductivity, total N, total C, available P<sub>av</sub>, K<sub>av</sub>, Ca<sub>av</sub>, Mg<sub>av</sub> and



240  $Mn_{av}$  were significant ( $p < 0.001$ ). These soil properties were typically higher closer to the house, while  
 available  $Al_{av}$  was significantly ( $p < 0.01$ ) lower. Except for texture and  $Al_{av}$ , all soil properties were lower  
 in the outfields compared to the infield zones. Generally, the difference in magnitude of soil properties  
 between the three fertility zones appeared in the order: **Inner - Outer < Outer - Outfield < Inner - Outfield.**  
 Within the infield zones, all the soil properties were significantly higher in the inner zone compared to  
 245 the outer zone, with the exception of available Al and texture.

Table 2. Variation in soil factors (Mean  $\pm$  SD) within a farm: infields (the inner and outer zones within the onset garden) and the outfield (annually cropped plot around the onset home garden).

| Properties        | Inner zone (N=40)                | Outer zone (N=40)                | Outfield zone (N=28)             |
|-------------------|----------------------------------|----------------------------------|----------------------------------|
| Sand (%)          | 4.2 $\pm$ 3.4 <sup>a</sup>       | 6.2 $\pm$ 5.6 <sup>a</sup>       | 3.9 $\pm$ 3.5 <sup>a</sup>       |
| Silt (%)          | 31.6 $\pm$ 4.7 <sup>a</sup>      | 32.2 $\pm$ 6.0 <sup>a</sup>      | 29.9 $\pm$ 3.3 <sup>a</sup>      |
| Clay (%)          | 64.6 $\pm$ 7.3 <sup>a</sup>      | 63.3 $\pm$ 8.5 <sup>a</sup>      | 66.2 $\pm$ 5.7 <sup>a</sup>      |
| pH                | 6.6 $\pm$ 0.7 <sup>a</sup>       | 6.3 $\pm$ 0.7 <sup>b</sup>       | 5.7 $\pm$ 0.6 <sup>c</sup>       |
| EC (dS/m)         | 0.3 $\pm$ 0.2 <sup>a</sup>       | 0.2 $\pm$ 0.1 <sup>b</sup>       | 0.1 $\pm$ 0.1 <sup>c</sup>       |
| TOC (%)           | 3.9 $\pm$ 1.2 <sup>a</sup>       | 3.2 $\pm$ 0.8 <sup>b</sup>       | 2.3 $\pm$ 0.4 <sup>c</sup>       |
| TN (%)            | 0.4 $\pm$ 0.1 <sup>a</sup>       | 0.3 $\pm$ 0.1 <sup>b</sup>       | 0.2 $\pm$ 0.1 <sup>c</sup>       |
| C:N               | 10.5 $\pm$ 0.9 <sup>a</sup>      | 10.1 $\pm$ 0.7 <sup>a</sup>      | 9.3 $\pm$ 0.6 <sup>b</sup>       |
| $P_{av}$ (mg/kg)  | 477.7 $\pm$ 543.9 <sup>a</sup>   | 305.1 $\pm$ 406.8 <sup>b</sup>   | 33.9 $\pm$ 43.5 <sup>c</sup>     |
| $K_{av}$ (mg/kg)  | 2063.6 $\pm$ 1381.2 <sup>a</sup> | 1314.8 $\pm$ 834.0 <sup>b</sup>  | 587.9 $\pm$ 385.9 <sup>c</sup>   |
| $Ca_{av}$ (mg/kg) | 4639.9 $\pm$ 2076.7 <sup>a</sup> | 3816.6 $\pm$ 1745.7 <sup>b</sup> | 2436.8 $\pm$ 1033.2 <sup>c</sup> |
| $Mg_{av}$ (mg/kg) | 880.7 $\pm$ 303.8 <sup>a</sup>   | 744.7 $\pm$ 253.6 <sup>b</sup>   | 535.6 $\pm$ 230.3 <sup>c</sup>   |
| $Mn_{av}$ (mg/kg) | 564.9 $\pm$ 187.8 <sup>a</sup>   | 468.1 $\pm$ 176.3 <sup>b</sup>   | 412.9 $\pm$ 144.4 <sup>b</sup>   |
| $Fe_{av}$ (mg/kg) | 492.8 $\pm$ 153.8 <sup>a</sup>   | 421.6 $\pm$ 126.8 <sup>b</sup>   | 396.6 $\pm$ 92.1 <sup>b</sup>    |
| $Al_{av}$ (mg/kg) | 443.5 $\pm$ 149.6 <sup>b</sup>   | 486.9 $\pm$ 123.9 <sup>ab</sup>  | 524.3 $\pm$ 136.4 <sup>a</sup>   |

Means followed by the same letter within a row are not significantly different at  $p < 0.05$ .

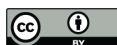

### 3.3 Leaf nutrient status: variation within the garden (infields)

Despite the observed significant differences in soil nutrient levels between inner and outer zone in the garden, there was very little difference in leaf nutrient levels (Table 3). Only leaf total N was significantly ( $p < 0.01$ ) higher in the inner zone ( $3.27 \pm 0.33$  %) than in the outer zone ( $2.97 \pm 0.43$  %). In the results obtained from different varieties and pooled for the fertility zones of larger sample households (Table S1), ranges for foliar macronutrient and Mo levels were relatively narrow. ~~Larger ranges were observed for micro-nutrients (Mn, Fe, Zn, and Cu). Levels of Ca, Mg and Fe in both inner and outer zones had similar values with the pooled average values of the mixed varieties. However, levels of N in the inner zone, and P in both zones were lower and K in both zones was higher than the pooled average. Levels of Mn in the outer zone and Al and Zn in both zones were higher while Mn in the inner zone and Cu in both zones were lower than the pooled average. Moreover, compared to the percentage of leaf samples falling within optimal and deficiency ranges using banana as a reference (Fig. S1), levels of N, Mn and Fe in both fertility zones fall within the optimum range, whereas Ca, Mg, and Cu in both zones fall within the deficiency range. However, P, K and Zn levels in both zones were above the optimum.~~

Table 3. Leaf nutrient status of enset plants of the variety locally named *Maze* in the inner and outer zones within enset gardens.

| Leaf nutrient | N  | Inner zone               | Outer zone               |
|---------------|----|--------------------------|--------------------------|
| C (%)         | 19 | 44.2±1.1 <sup>a</sup>    | 43.7±0.9 <sup>a</sup>    |
| N (%)         | 19 | 3.3±0.3 <sup>a</sup>     | 2.9±0.4 <sup>b</sup>     |
| P (%)         | 19 | 0.4±0.1 <sup>a</sup>     | 0.4±0.1 <sup>a</sup>     |
| K (%)         | 19 | 5.9±0.8 <sup>a</sup>     | 5.9±0.8 <sup>a</sup>     |
| Ca (%)        | 19 | 0.6±0.2 <sup>a</sup>     | 0.5±0.2 <sup>a</sup>     |
| Mg (%)        | 19 | 0.3±0.1 <sup>a</sup>     | 0.3±0.0 <sup>a</sup>     |
| Mn (mg/kg)    | 18 | 233.8±134.7 <sup>a</sup> | 282.9±192.5 <sup>a</sup> |
| Fe (mg/kg)    | 17 | 145.9±54.9 <sup>a</sup>  | 154.0±75.0 <sup>a</sup>  |
| Al (mg/kg)    | 18 | 102.2±36.6 <sup>a</sup>  | 94.5±27.9 <sup>a</sup>   |
| Cu (mg/kg)    | 19 | 6.3 ± 2.3 <sup>a</sup>   | 5.8 ± 1.6 <sup>a</sup>   |
| Zn (mg/kg)    | 19 | 36.1 ± 37.5 <sup>a</sup> | 51.7 ± 71.9 <sup>a</sup> |



Mo (mg/kg)                      18              1.8± 1.4                      2.2± 2.4

---

270 Means followed by the same letter within a row are not significantly different at  $p < 0.05$ .

### 3.4 Prevalence and distribution of symptomatic enset gardens

Of the studied 276 enset gardens (including the 40 gardens in which soil properties were studied), 60 gardens (21.7 %) were currently symptomatic, whereas 96 gardens (34.78 %) had disease symptoms in the recent past (Table 4). Disease prevalence increased with decreasing elevation irrespective of time periods. At present, the number of symptomatic gardens in the middle and lower elevations was 2.6 to 3.6 fold that in the higher elevation. Moreover, in the 40 enset gardens where soils were sampled, a similar trend with elevation was observed (Table S2). Of these 40 gardens, 14 (35.0 %) were currently symptomatic with the prevalence of 21.4 %, 26.7 %, and 63.6 % at higher, middle and lower elevations, respectively.

280

Table 4. Prevalence of EXW and the altitudinal distribution of symptomatic enset gardens (N=276) in the Chencha catchment, Gamo highlands.

| Elevation | N <sup>o</sup> of assessed gardens | N <sup>o</sup> of symptomatic gardens |      | Prevalence (%) |      |
|-----------|------------------------------------|---------------------------------------|------|----------------|------|
|           |                                    | Present                               | Past | Present        | Past |
| Higher    | 121                                | 12                                    | 26   | 9.9            | 21.5 |
| Middle    | 83                                 | 22                                    | 30   | 26.5           | 40.9 |
| Lower     | 72                                 | 26                                    | 36   | 36.1           | 50.0 |
| Overall   | 276                                | 60                                    | 96   | 21.7           | 34.8 |

### 285 3.5 Variation in soil fertility management and disease symptom presence

#### 3.5.1 Effect of soil fertility status

Patterns in the principal component analysis showed that symptomatic gardens were spread in all the quadrants. However, at present, 64 % out of the 14 symptomatic gardens were found on the positive side of component 1 axis (Fig. 3, score plot). These gardens have relatively higher levels of  $Ca_{av}$ ,  $P_{av}$ , TOC, TN,  $Mg_{av}$ , and pH (Fig. 3, loadings plot). Of these nine symptomatic gardens, seven (78 %) belonged to low lying (middle and lower) elevations. From the gardens with negative scores on component 1, fewer

290





(i.e. only five) were symptomatic. This part of the factor space was associated with lower levels of nutrients and higher levels of  $Al_{av}$ .

Analysis of variance showed that symptomatic gardens have significantly ( $p < 0.05$ ) higher levels of  $P_{av}$  and  $Ca_{av}$  compared to non-symptomatic gardens (Table 5). The other nutrients and texture could not be linked to the presence or absence of EXW symptoms when all elevations were pooled. However, analysis for each of the three elevations showed that currently symptomatic gardens have significantly ( $p < 0.05$ ) higher pH,  $P_{av}$ ,  $K_{av}$ , and  $Ca_{av}$  levels compared to non-symptomatic gardens in the lower elevation only (Table 6). When considering the last five years, significant difference ( $p < 0.05$ ) for TOC and TN was also observed between symptomatic and non-symptomatic gardens. Furthermore,  $P_{av}$ ,  $K_{av}$ ,  $Ca_{av}$  and  $Mg_{av}$  were slightly higher, and  $Al_{av}$  was lower in the symptomatic gardens, but the effect was not significant.

Table 5. Comparison of soil factors between symptomatic and non-symptomatic onset gardens (N=40) from the Chencha catchment, Gamo highlands. The average elevation of the symptomatic and non-symptomatic gardens was  $2,304.9 \pm 257.6$  and  $2,565.1 \pm 274.4$  masl, respectively.

| Soil factors      | Symptomatic           | Non-symptomatic       |
|-------------------|-----------------------|-----------------------|
| Sand (%)          | $3.9 \pm 3.2^a$       | $4.9 \pm 3.5^a$       |
| Silt (%)          | $31.2 \pm 5.2^a$      | $32.0 \pm 4.0^a$      |
| Clay (%)          | $58.3 \pm 16.8^a$     | $57.3 \pm 16.0^a$     |
| pH                | $6.7 \pm 0.5^a$       | $6.3 \pm 0.7^a$       |
| EC (dS/m)         | $0.3 \pm 0.2^a$       | $0.3 \pm 0.1^a$       |
| TOC (%)           | $3.9 \pm 0.9^a$       | $3.4 \pm 0.8^a$       |
| TN (%)            | $0.4 \pm 0.1^a$       | $0.3 \pm 0.1^a$       |
| C:N               | $10.5 \pm 0.4^a$      | $10.2 \pm 0.7^a$      |
| $P_{av}$ (mg/kg)  | $642.3 \pm 612.3^a$   | $270.6 \pm 272.5^b$   |
| $K_{av}$ (mg/kg)  | $2037.8 \pm 1023.2^a$ | $1521.4 \pm 905.6^a$  |
| $Ca_{av}$ (mg/kg) | $5088.8 \pm 1918.6^a$ | $3813.9 \pm 1390.8^b$ |
| $Mg_{av}$ (mg/kg) | $881.3 \pm 258.4^a$   | $779.6 \pm 211.1^a$   |
| $Mn_{av}$ (mg/kg) | $547.5 \pm 161.6^a$   | $501.7 \pm 165.9^a$   |
| $Fe_{av}$ (mg/kg) | $430.5 \pm 114.2^a$   | $470.0 \pm 126.8^a$   |



|                   |                     |                     |
|-------------------|---------------------|---------------------|
| $Al_{av}$ (mg/kg) | $417.8 \pm 103.5^a$ | $487.9 \pm 126.2^a$ |
|-------------------|---------------------|---------------------|

Means followed by the same letters within a row are not significantly different at  $p < 0.05$ .

Table 6. Comparison of soil factors (Mean $\pm$ SD) between currently symptomatic and non-symptomatic onset gardens in the lower elevation (N=11), units as in table 5.

| Soil factors | Symptomatic          | Non-symptomatic     | Nutrients | Symptomatic           | Non-symptomatic       |
|--------------|----------------------|---------------------|-----------|-----------------------|-----------------------|
| pH           | $6.9 \pm 0.4^a$      | $6.3 \pm 0.2^b$     | K         | $1927.4 \pm 544.4^a$  | $767.8 \pm 262.0^b$   |
| EC           | $0.4 \pm 0.1^a$      | $0.3 \pm 0.1^a$     | Ca        | $6743.8 \pm 1452.9^a$ | $4394.5 \pm 1777.7^b$ |
| C/N          | $8.9 \pm 3.9^a$      | $9.9 \pm 0.5^a$     | Mg        | $1035.3 \pm 173.1^a$  | $853.6 \pm 220.3^a$   |
| TOC          | $3.5 \pm 2.1^a$      | $3.7 \pm 0.9^a$     | Mn        | $572.4 \pm 139.9^a$   | $569.9 \pm 80.1^a$    |
| TN           | $0.3 \pm 0.2^a$      | $0.4 \pm 0.1^a$     | Fe        | $416.2 \pm 80.3^a$    | $385.3 \pm 131.1^a$   |
| $P_{av}$     | $1034.1 \pm 612.3^a$ | $146.8 \pm 185.4^b$ | Al        | $369.1 \pm 58.0^a$    | $443.5 \pm 157.8^a$   |

310 Means followed by the same letters within a row are not significantly different at  $p < 0.05$ .

### 3.5.2 Effect of leaf nutrient status

Comparison of foliar nutrient levels between symptomatic and non-symptomatic plants was significant ( $p < 0.05$ ) only for K and Cu (Table 7). K and Cu were higher in symptomatic and non-symptomatic plants, respectively.

320

325

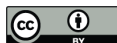

Table 7. Pairwise comparison of leaf nutrient status (Mean  $\pm$  SD) between symptomatic and non-symptomatic plants, each the same pairs of 10 local varieties ('Chamo', 'Checho', 'Falake', 'Geena', 'Katame', 'Katise', 'Kunka', 'Maze', 'Phello' and 'Sorghe').

| Leaf nutrient | N  | Symptomatic plants             | Non-symptomatic plants         |
|---------------|----|--------------------------------|--------------------------------|
| C (%)         | 20 | 44.6 $\pm$ 0.8 <sup>a</sup>    | 44.5 $\pm$ 0.8 <sup>a</sup>    |
| N (%)         | 20 | 3.2 $\pm$ 0.5 <sup>a</sup>     | 3.2 $\pm$ 0.5 <sup>a</sup>     |
| P (%)         | 20 | 0.4 $\pm$ 0.1 <sup>a</sup>     | 0.4 $\pm$ 0.1 <sup>a</sup>     |
| K (%)         | 19 | 4.6 $\pm$ 0.4 <sup>b</sup>     | 4.9 $\pm$ 0.5 <sup>a</sup>     |
| Ca (%)        | 20 | 0.5 $\pm$ 0.2 <sup>a</sup>     | 0.5 $\pm$ 0.2 <sup>a</sup>     |
| Mg (%)        | 19 | 0.3 $\pm$ 0.1 <sup>a</sup>     | 0.3 $\pm$ 0.0 <sup>a</sup>     |
| Mn (mg/kg)    | 19 | 232.2 $\pm$ 261.7 <sup>a</sup> | 203.4 $\pm$ 178.6 <sup>a</sup> |
| Fe (mg/kg)    | 19 | 125.3 $\pm$ 47.5 <sup>a</sup>  | 125.4 $\pm$ 36.4 <sup>a</sup>  |
| Al (mg/kg)    | 19 | 93.8 $\pm$ 35.7 <sup>a</sup>   | 88.2 $\pm$ 25.2 <sup>a</sup>   |
| Cu (mg/kg)    | 19 | 6.0 $\pm$ 1.2 <sup>b</sup>     | 5.4 $\pm$ 1.7 <sup>a</sup>     |
| Zn (mg/kg)    | 19 | 15.7 $\pm$ 3.8 <sup>a</sup>    | 16.2 $\pm$ 5.1 <sup>a</sup>    |
| Mo (mg/kg)    | 19 | 1.8 $\pm$ 1.4 <sup>a</sup>     | 1.8 $\pm$ 1.5 <sup>a</sup>     |
| Co (mg/kg)    | 20 | 0.1 $\pm$ 0.0 <sup>a</sup>     | 0.1 $\pm$ 0.0 <sup>a</sup>     |
| Ni (mg/kg)    | 19 | 1.3 $\pm$ 0.5 <sup>a</sup>     | 1.4 $\pm$ 0.6 <sup>a</sup>     |

330 Means followed by the same letters within a row are not significantly different ( $p < 0.05$ ).

## 4. Discussion

### 4.1 Soil fertility in relation to agro-ecology and management practices

335 Agro-ecological zones in the study area are mainly determined by altitude, which also affects temperature and rainfall, as precipitation decreases with decreasing elevation in tropical highlands (Cartledge, 1999; Berhanu et al., 2013; Minda et al., 2018). Strong leaching at the highest elevations is reflected by the elevated  $Al_{av}$  content and decreased soil bases ( $Ca_{av}$  and  $Mg_{av}$ ). Lower  $P_{av}$  levels at higher elevations could be attributed to slower decomposition of soil organic matter, but is more likely related to soil loss and land degradation or by P fixation on the acid and Al rich Nitisols (Elias, 2017; Shigaki et al., 2007;



340 Vancampenhout et al., 2006). For most of the measured soil properties however, intra-garden variability was more prominent than inter-garden variability, reflecting the paramount influence of management on soil properties in the study area. Continual application of manure and organic waste is common within the gardens but not in the outfields and decreases with distance from the house. This explains the clear intra-garden soil fertility gradient (Amede and Taboge, 2007; Elias et al., 1998; Hailelassie et al., 2006; 345 Tensaye et al., 1998) and the sharp contrast between gardens and outfields. Similar observations have been made for banana in Kenyan smallholder farms (Okumu et al., 2011). Applying more organic inputs closer to the house obviously is more practical, but also serves a purpose. Enset varieties grown for ‘kocho’ processing are planted in the fertile inner zone so they grow vigorously to have higher pseudostem and corm biomass. On the other hand, varieties meant for ‘amicho’ are planted in the outer less fertile 350 zone and receive manure only during their earlier growth stages, as slower growth is said to improve the texture and taste of the cooked product.

Levels of TOC, TN,  $P_{av}$ ,  $K_{av}$ ,  $Ca_{av}$ ,  $Mg_{av}$ ,  $Mn_{av}$  and  $Fe_{av}$  were ~~surprisingly high~~ inside the enset gardens, much higher than typical values reported in literature (Ayenew et al., 2018; Elias; 2017; Hengl et al., 2017; Mamo et al., 2014; Mamo et al., 2002; Moges and Holden, 2008; Nabhan et al., 1999; Roy et al., 355 2006). The pH measured in the enset gardens is comparable to the optimum range suggested for enset, i.e. 5.6-7.3 (Brandt et al., 1997) and significantly higher than in the outfields, most likely due to the ~~liming~~ effect of the manure, compost and ashes applied in the gardens (Whalen et al., 2000; Abdala et al., 2015; Agbebe and Adekiya, 2012). The outfields frequently receive urea and DAP, which are more likely to further acidify the soil (Eliyas et al., 1998; Zelleke et al, 2010). For soil nutrients, recommended levels 360 are not available for enset gardens, although farmers typically expect an increase in growth with higher organic inputs (Amede and Taboge, 2007). Nutrient levels observed in enset gardens were much higher compared to typical levels in banana farms (Ndabamenye et al., 2013; Nyombi et al, 2010). Nevertheless, for our study area, data suggest that more inputs than required are applied in the gardens, while the outfields suffer from a lack of soil fertility. This hypothesis is supported by the lack of variation observed 365 in foliar nutrient levels between the inner and outer garden zone, despite significant differences in soil nutrient status. Hence, agronomical research to determine optimal enset nutrient requirements is urgently needed to optimize input use in the infields and curb soil degradation and low arable yields in the outfields.



Foliar N, P and K in our study were comparable to earlier reports by Uloro and Mengel (1994) for enset grown with inorganic NPK. We further compared our leaf nutrient (Fig.S1) contents to available literature for enset and standards in banana (Table 8). Our results were largely comparable to Nurfeta et al. (2008) but P and K levels were higher than all the literature for enset and banana (Lahav and Turner, 1989; Reuter and Robinson, 1997; Turner and Barkus, 1981). Considering standards in banana, our results were comparable for N, Mn, and Fe; above optimum for P, K and deficient for Ca, Mg and micronutrients such as Cu and Zn. Our results suggest a potential additional drawback of over-fertilization, as low Ca and Mg could be linked to a reduced absorption caused by high K levels (Baker and Pilbeam, 2007, Hiltunen and White, 2002; Lahav and Turner, 1989) and a deficiency in micronutrients may be induced by excessive rates of P (Huang et al., 2000; Singh et al., 1988; Soltangheisi et al., 2013). These results however need to be interpreted with caution, as optimal leaf sampling methods for enset leaves are not known and optimal enset nutrient levels may differ substantially from those reported for banana.

380

Table 8. Comparison of mean leaf nutrient levels in our study against reported values for enset and banana, units as in table 7.

| P       | K       | Ca      | Mg       | Mn       | Cu   | Zn    | Fe     | Reference                 |
|---------|---------|---------|----------|----------|------|-------|--------|---------------------------|
| 0.4     | 5.3     | 0.9     | 0.3      | 484      | 10   | 17.4  | 552    | Nurfeta et al., 2008      |
| 0.2     | 3.1     | 2.2     | 0.3      | 188      | 2.5  | 19.7  | -      | Mohammed et al., 2013     |
| 0.4     | 4.1     | 1.1     | 0.3      | 194      | 2.2  | 10.8  |        | Nurfeta et al., 2009      |
| 0.2-0.3 | 3.1-4.0 | 0.8-1.2 | 0.3-0.46 | 100-2200 | 7-10 | 21-35 | 70-200 | Reuter and Robinson, 1997 |
| 0.2     | 3.3     | 0.8     | 0.4      | 1476.0   | 12.1 | 17.6  | 150    | Turner and Barkus, 1981   |
| 0.4     | 5.6     | 0.6     | 0.3      | 257.6    | 8.6  | 22.5  | 148.2  | Our study                 |

#### 4.2 Effects of altitude and soil nutrients on Xanthomonas wilt disease incidence

385 In our study area, lower lying areas had a significantly higher prevalence of affected gardens, which is in line with results reported by Wolde et al. (2016) and Zerfu et al. (2018) and typically attributed to faster





disease progression in the warmer climate at lower elevation (Berhanu et al., 2013; Cartledge, 1999). On the contrary, Ocimati et al. (2019) did not find a significant effect of altitude and temperature on Xanthomonas wilt spread in banana farms. However, as enset is cultivated at higher elevations than  
390 bananas, elevation may become a more determining factor for enset.

A plant's susceptibility to disease is often reported to increase when nutrients in plants are at a low concentration or deficient (Graham, 1983; Thongbai et al., 1993), yet an excessive amount of nutrients has also been reported to have negative effects, particularly in the case of high nitrogen levels (Dordas, 2008; Huber and Graham, 1999). In our study area, symptomatic gardens were mostly associated with  
395 increased levels of available P and Ca in the soil. However, as nutrients were also highest at the lowest altitudes, these factors may be confounded. When assessing disease prevalence at the lower elevation only, soils of symptomatic farms still have significantly higher levels of these nutrients. Hence, especially in view of the observed over-fertilisation, the potential of soil nutrients to amplify the current EXW epidemic may not be overlooked. Contrary to our findings, higher K, Ca and N levels reduced bacterial  
400 wilt incidence in banana (Atim et al., 2013) and NPK levels affected Xanthomonas wilt incidence and severity in banana (Ochola et al., 2014). Yet the effect of nutrients on a plant's response to disease is often species specific (Ghorbani et al., 2009; Spann et al., 2009) and results obtained in banana are not necessarily applicable to enset. Zn deficiency increased susceptibility to Fusarium wilt in banana (Hecht-Buchholz et al., 1997) and although we suspect Zn deficiency in enset in our study area, it cannot be  
405 substantiated based on this dataset alone.

## Conclusion

In this study, we conducted a reconnaissance observational study into soil fertility and EXW prevalence in enset gardens in the Gamo highlands in 276 smallholder enset gardens. Our results indicated that soil  
410 fertility was strongly influenced by management, with sharp contrasts within enset gardens, and between enset gardens and outfields. Gardens in the study area show very high levels for most nutrients, with little response of foliar nutrient content to an increase in soil nutrients. Hence, over-fertilization is likely and establishing evidence-based nutrient recommendations for enset would benefit soil quality and productivity both in the gardens as in the outfields. Disease prevalence was lower at higher altitude, and

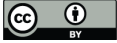

415 in fields with lower soil pH and available P, K and Ca levels. This suggests that effects of environment and nutrients on the current EXW epidemic may not be overlooked, although more experimental work is needed to exclude confounding of factors.

**Author contributions.** K.V, R.S, F.Wo. and F.We. designed the observational setup, K.V. and R.M  
420 designed the soil and nutrient components of the research, R.S. designed the plant and disease related components. S.S. and L.V. collected and analyzed the data and S.S. compiled the manuscript, supervised by K.V., F.E and R.S. All authors contributed to the interpretation and discussion of the results.

**Competing interests.** The authors declare that they have no conflict of interest.

**Data availability:**

425 DOI: <https://doi.org/10.25502/apce-ng55/d>

CKAN link: <http://data.iita.org/dataset/reconnaissance-study-on-ecological-niche-of-ensete-ventricosum>

**Acknowledgements.** The authors greatly acknowledge Flemish Interuniversity Council for University  
430 Development Cooperation VLIR-UOS for funding this research (TEAM Project ‘ENSET’, grant number ZEIN2015PR407). Contribution of farmers of Chencha who shared their experience is duly thanked. We want to extend our gratitude to Alene Abeje and Azmera Walche for their help during field data gathering. The authors would like to thank lab technicians Lore Fondu and Kim Vekemans for their help in laboratory measurements.

435



## References

- 440 Abdala, D. B., da Silva, I. R., Vergütz, L., and Sparks, D. L.: Long-term manure application effects on phosphorus speciation, kinetics and distribution in highly weathered agricultural soils. *Chemosphere*, 119, 504-514, <https://doi.org/10.1016/j.chemosphere.2014.07.029>, 2015.
- Agbede, T. M. and Adekiya, A. O.: Effect of wood ash, poultry manure and NPK fertilizer on soil and leaf nutrient composition, growth and yield of okra (*Abelmoschus esculentus*). *Emirates Journal of Food and Agriculture*, 24, 314-321, 2012.
- Agrios, G. N.: *Plant pathology* (5<sup>th</sup> ed). Elsevier Academic Press, London, Pp. 952, 2005.
- 445 Allemann, J., Laurie, S. M., Thiart, S., Vorster, H. J., and Bornman, C. H.: Sustainable production of root and tuber crops (potato, sweet potato, indigenous potato, cassava) in southern Africa. *South African Journal of Botany*, 70, 60-66, [https://doi.org/10.1016/S0254-6299\(15\)30307-0](https://doi.org/10.1016/S0254-6299(15)30307-0), 2004.
- 450 Amede, T. and Taboge, E.: Optimizing soil fertility gradients in the Enset (*Ensete ventricosum*) systems of the Ethiopian Highlands: Trade-offs and local innovations. In *Advances in Integrated Soil Fertility management in Sub-Saharan Africa: Challenges and Opportunities*, 289-297, 2007.
- Andeta, A. F., Vandeweyer, D., Woldesenbet, F., Eshetu, F., Hailemichael, A., Woldeyes, S, Crauwels., B, Lievens., J, Ceusters., K, Vancampenhout and Van Campenhout, L.: Fermentation of enset (*Ensete ventricosum*) in the Gamo highlands of Ethiopia: physicochemical and microbial



- 455 community dynamics. *Food microbiology*, 73, 342-350, <https://doi.org/10.1016/j.fm.2018.02.011>, 2018.
- Assefa, E. and Hans-Rudolf, B.: Indigenous resource management practices in the Gamo Highland of Ethiopia: challenges and prospects for sustainable resource management. *Sustainability Science*, 12, 695-709. <http://doi.org/10.1007/s11625-017-0468-7>, 2017.
- 460 Atim, M., Beed, F., Tusiime, G., Tripathi, L., and van Asten, P.: High potassium, calcium, and nitrogen application reduce susceptibility to banana *Xanthomonas* wilt caused by *Xanthomonas campestris* pv. *musacearum*. *Plant Disease*, 97, 123-130. <https://doi.org/10.1094/PDIS-07-12-0646-RE>, 2013.
- Ayalew, D., Barbey, P., Marty, B., Reisberg, L., Yirgu, G., and Pik, R.: Source, genesis, and timing of giant ignimbrite deposits associated with Ethiopian continental flood basalts. *Geochimica et*  
465 *Cosmochimica Acta*, 66, 1429-1448.  
[https://doi.org/10.1016/S0016-7037\(01\)00834-1](https://doi.org/10.1016/S0016-7037(01)00834-1), 2002).
- Ayenew, B., Tadesse, A. M., Kibret, K., and Melese, A.: Phosphorus status and adsorption characteristics of acid soils from Cheha and Dinsho districts, southern highlands of Ethiopia. *Environmental Systems Research*, 7, 1-14.  
470 <https://doi.org/10.1186/s40068-018-0121-1>, 2018.
- Berhanu, B., Melesse, A.M., and Seleshi, Y.: GIS-based hydrological zones and soil geodatabase of Ethiopia. *Catena*, 104, 21-31, <https://doi.org/10.1016/j.catena.2012.12.007>, 2013.
- Blomme, G., Sebuwufu, G., Addis, T., and Turyagyenda, L. F.: Relative performance of root and shoot development in enset and east African highland bananas. *African Crop Science Journal*, 16, 51-  
475 57, <https://doi.org/10.4314/acsj.v16i1.54339>, 2008.
- Borrell, J. S., Biswas, M. K., Goodwin, M., Blomme, G., Schwarzacher, T., Heslop-Harrison, J. S., Molla, E. L. Abebe, M. W., Adamu, B., Simon, K., Steven, J., Ermias, L. M., Aaron, P. Davis.,

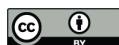

- Feleke, W., Kathy, W., Sebsebe, D., and Paul, W.: Enset in Ethiopia: a poorly characterized but resilient starch staple. *Annals of Botany*, XX, 1-20. <https://doi.org/10.1093/aob/mcy214>, 2019.
- 480 Brandt, S. A., Spring, A., Hiebsch, C., McCabe, J. T., Tabogie, E., Diro, M., and Tesfaye, S.: The tree against hunger. Enset-based agricultural systems in Ethiopia. Washington DC: American Association for the Advancement of Science, Pp.56, 1997.
- Cartledge, D. M.: The management of *Ensete ventricosum* in the Gamo Highlands of southwest Ethiopia. *Culture and Agriculture*, 21, 35-38, <https://doi.org/10.1525/cag.1999.21.1.35>, 1999.
- 485 Coltorti, M., Pieruccini, P., Arthur, K. J., Arthur, J., and Curtis, M.: Geomorphology, soils and palaeosols of the Chenchä area (Gamo Gofa, southwestern Ethiopian highlands). *Journal of African Earth Sciences*, 151, 225-240, <https://doi.org/10.1016/j.jafrearsci.2018.12.018>, 2019.
- Date, A.R. and Gray, A.L.: Development progress in plasma source mass spectrometry: *Analyst*, 108, 159-165, <https://doi.org/10.1039/AN9830800159>, 1983.
- 490 Dordas, C.: Role of nutrients in controlling plant diseases in sustainable agriculture. A review. *Agronomy for Sustainable Development*, 28, 33-46. <https://doi.org/10.1051/agro:2007051>, 2008.
- Egner, H., Riehm, H., and Domingo, W. R.: Investigations of the chemical soil analysis as a basis for the evaluation of nutrient status in soil. II. Chemical extraction methods for phosphorus and potassium determination. *K Lantbruks Högsk Ann*, 26, 199-215, 1960.
- 495 Elias, E., Morse, S., and Belshaw, D. G. R.: Nitrogen and phosphorus balances of Kindo Koisha farms in southern Ethiopia. *Agriculture, Ecosystems and Environment*, 71, 93-113. [https://doi.org/10.1016/S0167-8809\(98\)00134-0](https://doi.org/10.1016/S0167-8809(98)00134-0), 1998.
- Elias, E.: Characteristics of Nitisol profiles as affected by land use type and slope class in some Ethiopian highlands. *Environmental Systems Research*, 6, 1-20. <https://doi.org/10.1186/s40068-017-0097-2>, 2017.
- 500 Garedew, B., and Ayiza, A.: Major Constraints of Enset (*Ensete ventricosum*) Production and Management in Masha District, Southwest Ethiopia. *International Journal of Agricultural Research*, 13, 87-94. <http://doi.org/10.3923/ijar.2018.87.94>, 2018.
- 505 Ghorbani, R., Wilcockson, S., Koocheki, A., and Leifert, C.: Soil management for sustainable crop disease control: a review. In *Organic farming, pest control and remediation of soil pollutants*, Springer, Dordrecht, 177-201, 2009.
- Graham, R. D.: Effects of nutrient stress on the susceptibility of plants to disease with particular reference to the trace elements. In *Advances in botanical research*. Academic Press, 10, 221-276. [https://doi.org/10.1016/S0065-2296\(08\)60261-X](https://doi.org/10.1016/S0065-2296(08)60261-X), 1983.
- 510 Hailelassie, A., Priess, J. A., Veldkamp, E., and Lesschen, J. P.: Smallholders' soil fertility management in the central highlands of Ethiopia: implications for nutrient stocks, balances and



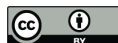

- sustainability of agroecosystems. *Nutrient Cycling in Agroecosystems*, 75, 135-146. <https://doi.org/10.1007/s10705-006-9017-y>, 2006.
- 515 Handoro, F., and Michael, G. W.: Evaluation of enset clone meziya against enset bacterial wilt. In 8th African Crop Science Society Conference, El-Minia, Egypt, October 27-31, 887-890, 2007.
- Hecht-Buchholz, C., Borges-Pérez, A., Fernandez Falcon, M., and Borges, A. A.: Influence of zinc nutrition on Fusarium wilt of banana-an electron microscopic investigation. In II International Symposium on Banana: I International Symposium on Banana in the Subtropics 490, 277-284. <https://doi.org/10.17660/ActaHortic.1998.490.27>, 1997.
- 520 <https://doi.org/10.17660/ActaHortic.1998.490.27>, 1997.
- Hengl, T., Leenaars, J. G. B., Shepherd, K. D., Walsh, M. G., Heuvelink, G. B. M., Mamo, T., Tilahun, H., Berkhout, E., Cooper, M., Fegraus, E., Wheeler, I., and Kwabena, N. A.: Soil nutrient maps of Sub-Saharan Africa: assessment of soil nutrient content at 250 m spatial resolution using machine learning. *Nutrient Cycling in Agroecosystems*, 109, 77-102. <https://doi.org/10.1007/s10705-017-9870-x>, 2017.
- 525 <https://doi.org/10.1007/s10705-017-9870-x>, 2017.
- Huang, C., Barker, S. J., Langridge, P., Smith, F. W., and Graham, R. D.: Zinc deficiency up-regulates the expression of high-affinity phosphate transporter genes in both phosphate-sufficient and-deficient barley roots. *Plant Physiology*, 124, 415-422. <https://doi.org/10.1104/pp.124.1.415>, 2000.
- 530 Huber, D. M. and Graham, R. D.: The role of nutrition in crop resistance and tolerance to diseases. In 'Mineral nutrition of crops: fundamental mechanisms and implications'. Food Product Press, New York, 169-204, 1999.
- Huber, D. M. and Haneklaus, S.: Managing nutrition to control plant disease. *Landbauforschung Volkenrode*, 57, 313, 2007.
- 535 Huber, D., Römheld, V., and Weinmann, M.: Relationship between nutrition, plant diseases and pests. In Marschner's mineral nutrition of higher plants, Academic Press, 283-298. <https://doi.org/10.1016/B978-0-12-384905-2.00010-8>, 2012.
- ISRIC.: Procedures for soil analysis. 6<sup>th</sup> ed. Wageningen, the Netherlands, 2002.



- 540 Jury, M. R.: Southern Ethiopia rift valley lake fluctuations and climate. *Scientific Research and Essays*, 9, 794-805, <https://doi.org/10.5897/SRE2014.6062>, 2014.
- Kirsten, W. J., and Hesselius, G. U.: Rapid, automatic, high capacity Dumas determination of nitrogen. *Microchemical Journal*, 28, 529-547.  
[https://doi.org/10.1016/0026-265X\(83\)90011-5](https://doi.org/10.1016/0026-265X(83)90011-5), 1983.
- 545 Lahav, E., and Turner, D. W.: Fertilizing for high yield banana. International potash Institute, Berne/Switzerland, IPI Bulletin, 62, 1989.
- Mamo, T., Karlton, E., and Bekele, T.: Soil fertility status and fertilizer recommendation atlas for Tigray Regional State, Ethiopia. Ministry of Agriculture and Ethiopian Agricultural Transformation Agency, 91, 2014.
- 550 Mamo, T., Richter, C., and Heiligtag, B.: Phosphorus availability studies on ten Ethiopian Vertisols. *Journal of Agriculture and Rural Development in the Tropics and Subtropics*, 103, 177-183, 2002.
- Mariño, R. and Banga, R. S.: UN sustainable development goals (SDGs): A time to act. *Journal of Oral Research*, 5, 5-6. <https://doi.org/10.17126/joralres.2016.002>, 2016.
- 555 Mburu, K., Oduor, R., Mgotu, A., and Tripathi, L.: Silicon application enhances resistance to Xanthomonas wilt disease in banana. *Plant Pathology*, 65, 807-818.  
<https://doi.org/10.1111/ppa.12468>, 2016.
- Martin-Prével, P.: Sampling of banana for foliar analysis: Consequences of differences in techniques. *Fruits*, 32, 151-166, 1977.
- 560 Merga, I. F., Tripathi, L., Hvoslef-Eide, A. K., and Gebre, E.: Application of genetic engineering for control of bacterial wilt disease of enset, Ethiopia's sustainability crop. *Frontiers in Plant Science*, 10, 1-8, <https://doi.org/10.3389/fpls.2019.00133>, 2019.
- Minda, T. T., Van Der Molen, M. K., Struik, P. C., Combe, M., Jiménez, P. A., Khan, M. S., and De Arellano, J. V. G.: The combined effect of elevation and meteorology on potato crop dynamics: A



- 565 10-year study in the Gamo Highlands, Ethiopia. *Agricultural and Forest Meteorology*, 262, 166-177, <https://doi.org/10.1016/j.agrformet.2018.07.009>, 2018.
- Moges, A., and Holden, N. M.: Soil fertility in relation to slope position and agricultural land use: A case study of Umbulo catchment in southern Ethiopia. *Environmental management*, 42, 753-763, <https://doi.org/10.1007/s00267-008-9157-8>, 2008.
- 570 Mohammed, B., Gabel, M., and Karlsson, L. M.: Nutritive values of the drought-tolerant food and fodder crop enset. *African Journal of Agricultural Research*, 8, 2326-2333. <https://doi.org/10.5897/AJAR12.1296>, 2013.
- Mwebaze, J. M., Tusiime, G., Teshemereirwe, W. K., and Kubiriba, J.: The survival of *Xanthomonas campestris* pv. *musacearum* in soil and plant debris. *African Crop Science Journal*, 14, 121 – 127, 2006.
- 575 Nabhan, H., Mashali, A. M., and Mermut, A. R.: Integrated soil management for sustainable agriculture and food security in Southern and East Africa. Proceedings of the expert consultation. Harare, Zimbabwe. Food and Agriculture Organization of the United Nations. Rome, Italy, 415, 1999.
- Nayar, N. M.: The contribution of tropical tuber crops towards food security. *Journal of Root Crops*, 40, 3-14, 2015.
- 580 Ndabamenye, T., Van Asten, P. J., Blomme, G., Vanlauwe, B., Uzayisenga, B., Annandale, J. G., and Barnard, R. O.: Nutrient imbalance and yield limiting factors of low input East African highland banana (*Musa* spp. AAA-EA) cropping systems. *Field Crops Research*, 147, 68-78. <https://doi.org/10.1016/j.fcr.2013.04.001>, 2013.
- 585 Negash, A., Puite, K., Schaart, J., Visser, B., and Krens, F.: In vitro regeneration and micro-propagation of enset from southwestern Ethiopia. *Plant Cell, Tissue and Organ Culture*, 62, 153-158. <https://doi.org/10.1023/A:1026701419739>, 2000.
- Nurfeta, A., Tolera, A., Eik, L. O., and Sundstøl, F.: Yield and mineral content of ten enset (*Ensete ventricosum*) varieties. *Tropical Animal Health and Production*, 40, 299-309. <https://doi.org/10.1007/s11250-007-9095-0>, 2008.
- 590 Nurfeta, A., Tolera, A., Eik, L. O., and Sundstøl, F.: Feeding value of enset (*Ensete ventricosum*), *Desmodium intortum* hay and untreated or urea and calcium oxide treated wheat straw for sheep. *Journal of Animal Physiology and Animal Nutrition*, 93, 94-104. <https://doi.org/10.1111/j.1439-0396.2007.00784.x>, 2009.
- 595 Nyombi, K., Van Asten, P. J., Corbeels, M., Taulya, G., Leffelaar, P. A., and Giller, K. E.: Mineral fertilizer response and nutrient use efficiencies of East African highland banana (*Musa* spp., AAA-



EAHB, cv. Kisansa). *Field Crops Research*, 117(1), 38-50.  
<https://doi.org/10.1016/j.fcr.2010.01.011>, 2010.

600 Ochola, D., Ocimati, W., Tinzaara, W., and Karamura, E.B.: Interactive effects of fertilizer and inoculum concentration on subsequent development of *Xanthomonas* wilt in banana. *African Journal of Agricultural Research*, 9, 2727-2735. <https://doi.org/10.5897/AJAR2014.8787>, 2014.

Ocimati, W., Bouwmeester, H., Groot, J. C., Tiftonell, P., Brown, D., and Blomme, G.: The risk posed by *Xanthomonas* wilt disease of banana: Mapping of disease hotspots, fronts and vulnerable landscapes. *PloS one*, 14, 1-19, <https://doi.org/10.1371/journal.pone.0213691>, 2019.

605 Okumu, M. O., van Asten, P. J., Kahangi, E., Okech, S. H., Jefwa, J., and Vanlauwe, B.: Production gradients in smallholder banana (cv. Giant Cavendish) farms in Central Kenya. *Scientia Horticulturae*, 127, 475-481, <https://doi.org/10.1016/j.scienta.2010.11.005>, 2011.

Olmstead, J.: The versatile ensete plant: Its use in the Gamu highlands. *Journal of Ethiopian Studies*, 12, 147-158, 1974.

610 Quimio, A.J and Tessera, M.: Diseases of enset. In: Tsedeke A, Clifton H, Steven BA, Gebre-Mariam, S. (eds). *Enset-based sustainable agriculture in Ethiopia*. In *Proceedings of the International*



- Workshop on enset. Ethiopian Institute of Agricultural Research, Addis Ababa, Ethiopia, 188-203, 1996.
- Reuter, D.J. and Robinson, J.B.: Fruits, vines and nuts. In Plant analysis: an interpretation manual. CSIRO Publishing, Collingwood, 354–355, 1997.
- 615 Roy, R.N., Finck, A., Blair, G.J., and Tandon H.L.S.: Plant nutrition for food security. A guide for integrated nutrient management. *Experimental Agriculture*, 43, 132-132. <https://doi.org/10.1017/S0014479706394537>, 2006.
- Rosegrant, M. W. and Cline, S. A.: Global food security: challenges and policies. *Science*, 302, 1917-1919. <https://doi.org/10.1126/science.1092958>, 2003.
- 620 SAS Institute Inc.: JMP Pro 14 software, SAS Institute Inc., Cary, North Carolina, USA, 2018.
- Shigaki, F., Sharpley, A., and Prochnow, L. I.: Rainfall intensity and phosphorus source effects on phosphorus transport in surface runoff from soil trays. *Science of the Total Environment*, 373, 334-343. <https://doi.org/10.1016/j.scitotenv.2006.10.048>, 2007.
- Singh, J. P., Karamanos, R. E., and Stewart, J. W. B.: The mechanism of phosphorus-induced zinc deficiency in bean (*Phaseolus vulgaris* L.). *Canadian Journal of Soil Science*, 68, 345-358. <https://doi.org/10.4141/cjss88-032>, 1988.
- Soltangheisi, A., Ishak, C. F., Musa, H. M., Zakikhani, H., and Rahman, Z. A.: Phosphorus and zinc uptake and their interaction effect on dry matter and chlorophyll content of sweet corn (*Zea mays* var. *saccharata*). *J Agron*, 12: 187-192. <https://doi.org/10.3923/ja.2013.187.192>, 2013.
- 630 Spann, T. M., and Schumann, A. W.: The role of plant nutrients in disease development with emphasis on citrus and huanglongbing. In *Proc. Fla. State Hort Soc*, 122, 169-171, 2009.
- Tadesse, M., Bobosha, K., Diro, M., and Gizachew, W. M. (2003). Enset bacterial wilt sanitary control in Gurage zone. Research Report No. 53, Ethiopian Agricultural Research Organization, Ethiopia, 23.
- 635 Tamire, C., and Argaw, M.: Role of Enset (*Ensete ventricosum* (Welw.) Cheesman) in soil rehabilitation in different agro-ecological zones of Hadiya, Southern Ethiopia. *Am J Environ Protect*, 4, 285-291, <https://doi.org/10.11648/j.ajep.20150406.14>, 2015.
- Tefera, M., Chernet, T., and Haro, W.: Explanation of the geological map of Ethiopia, *Geological Survey of Ethiopia*. 79, 1996.
- 640 Tensaye, A. W., Lindén, B., and Ohlander, L.: Enset farming in Ethiopia: Soil nutrient status in Shoa and Sidamo regions. *Communications in Soil Science and Plant Analysis*, 29, 193-210, <https://doi.org/10.1080/00103629809369938>, 1998.
- Tesfaye, B., and Lüdders, P.: Diversity and distribution patterns of enset landraces in Sidama, Southern Ethiopia. *Genetic Resources and Crop Evolution*, 50, 359-371. <https://doi.org/10.1023/A:1023918919227>, 2003.
- 645



- Thongbai, P., Hannam, R. J., Graham, R. D., and Webb, M. J.: Interaction between zinc nutritional status of cereals and Rhizoctonia root rot severity. *Plant and Soil*, 153, 207-214.  
<https://doi.org/10.1007/BF00012994>, 1993.
- 650 Tsegaye, A. and Struik, P. C.: Enset (*Ensete ventricosum* (Welw.) Cheesman) kocho yield under different crop establishment methods as compared to yields of other carbohydrate-rich food crops. *NJAS-Wageningen Journal of Life Sciences*, 49, 81-94. [https://doi.org/10.1016/S1573-5214\(01\)80017-8](https://doi.org/10.1016/S1573-5214(01)80017-8), 2001.
- 655 Tsegaye, A. and Struik, P. C.: Analysis of enset (*Ensete ventricosum*) indigenous production methods and farm-based biodiversity in major enset-growing regions of southern Ethiopia. *Experimental Agriculture*, 38, 291-315.  
<https://doi.org/10.1017/S0014479702003046>, 2002.
- Turner, D. W. and Barkus, B.: Nutrient concentrations in a range of banana varieties grown in the subtropics. *Fruits*, 36, 217-222, 1981.
- 660 Uloro, Y. and Mengel, K.: Response of ensete (*Ensete ventricosum* W.) to mineral fertilizers in southwest Ethiopia. *Fertilizer Research*, 37, 107-113,  
<https://doi.org/10.1007/BF00748551>, 1994.
- Vancampenhout, K., Nyssen, J., Gebremichael, D., Deckers, J., Poesen, J., Haile, M., and Moeyersons, J.: Stone bunds for soil conservation in the northern Ethiopian highlands: Impacts on soil fertility and crop yield. *Soil and Tillage Research*, 90, 1-15.  
665 <https://doi.org/10.1016/j.still.2005.08.004>, 2006.
- Whalen, J. K., Chang, C., Clayton, G. W., and Carefoot, J. P.: Cattle manure amendments can increase the pH of acid soils. *Soil Science Society of America Journal*, 64, 962-966.  
<https://doi.org/10.2136/sssaj2000.643962x>, 2000.
- 670 Winge, R. K., Peterson, V. J., and Fassel, V. A.: Inductively coupled plasma-atomic emission spectroscopy: prominent lines. *Applied Spectroscopy*, 33, 206-219.  
<https://doi.org/10.1366/0003702794925895>, 1979.



- Wolde, M., Ayalew, A., and Chala, A.: Assessment of bacterial wilt (*Xanthomonas campestris* pv. *musacearum*) of enset in southern Ethiopia. *African Journal of Agricultural Research*, 11, 1724-1733, <https://doi.org/10.5897/AJAR2015.9959>. 2016.
- 675 Welde-Michael, G., Bobosha, K., Blomme, G., Addis, T., Mengesha, T., and Mekonnen, S.: Evaluation of enset clones against enset bacterial wilt. *African Crop Science Journal*, 16, 89-95. <http://doi.org/10.4314/acsj.v16i1.54348>, 2008a.
- Welde-Michael, G., Bobosha, K., Addis, T., Blomme, G., Mekonnen, S., and Mengesha, T.: Mechanical transmission and survival of bacterial wilt on enset. *African Crop Science Journal*, 16, 680 97-102. <http://doi.org/10.4314/acsj.v16i1.54349>, 2008b.
- Yemataw, Z., Mekonen, A., Chala, A., Tesfaye, K., Mekonen, K., Studholme, D. J., and Sharma, K.: Farmers' knowledge and perception of enset *Xanthomonas* wilt in southern Ethiopia. *Agriculture and food security*, 6, 1-12. <https://doi.org/10.1186/s40066-017-0146-0>, 2017.
- Yemataw, Z., Tesfaye, K., Zeberga, A., and Blomme, G.: Exploiting indigenous knowledge of subsistence farmers' for the management and conservation of Enset (*Ensete ventricosum* (Welw.) Cheesman) (musaceae family) diversity on-farm. *Journal of Ethnobiology and Ethnomedicine*, 12, 685 1-25. <http://doi.org/10.1186/s13002-016-0109-8>, 2016.
- Yemataw, Z., Mohamed, H., Diro, M., Addis, T., and Blomme, G.: Enset (*Ensete ventricosum*) clone selection by farmers and their cultural practices in southern Ethiopia. *Genetic Resources and Crop Evolution*, 61, 1091-1104, 690 <https://doi.org/10.1007/s10722-014-0093-6>, 2014.
- Yirgou, D. and Bradbury, J. F.: Bacterial wilt of Enset (*Ensete ventricosum*) incited by *Xanthomonas musacearum* sp. *Phytopathology*, 58, 111-112, 1968.
- Zelleke, G., Getachew, A., Abera, D., and Rashid, S.: Fertilizer and soil fertility potential in Ethiopia: 695 Constraints and opportunities for enhancing the system. IFPRI. 63, 2010.
- Zerfu, A., Gebre, S. L., Berecha, G., and Getahun, K.: Assessment of spatial distribution of enset plant diversity and enset bacteria wilt using geostatistical techniques in Yem special district, Southern Ethiopia. *Environmental Systems Research*, 7, 1-13. <https://doi.org/10.1186/s40068-018-0126-9>, 2018.
- 700 Zewdie, S., Fetene, M., and Olsson, M.: Fine root vertical distribution and temporal dynamics in mature stands of two enset (*Ensete ventricosum* Welw Cheesman) clones. *Plant and Soil*, 305, 227-236. <https://doi.org/10.1007/s11104-008-9554-z>, 2008.
